# Supplementary material for: Molecular characterization of cell-free eccDNAs in human plasma
Source: PubMed Central journal article supplement (PMC5591271; doi:10.1038/s41598-017-11368-w), 2017-09-08
Supplement: 41598_2017_11368_MOESM1_ESM.pdf [file 41598_2017_11368_MOESM1_ESM.pdf]

## **Molecular characterization of cell-free eccDNAs in human plasma**

Jing Zhu<sup>1,2</sup>, Fan Zhang<sup>3</sup>, Meijun Du<sup>2</sup>, Peng Zhang<sup>2</sup>, Songbin Fu<sup>1</sup>, Liang Wang<sup>2\*</sup>

<sup>1</sup>Laboratory of Medical Genetics, Harbin Medical University, Harbin, Heilongjiang, China. 150081.

<sup>2</sup>Department of Pathology and MCW Cancer Center, Medical College of Wisconsin, Milwaukee, WI 53226, USA

<sup>3</sup>School of Computer Science and Technology, Harbin Institute of Technology, Harbin, Heilongjiang, China. 150001

\*correspondence:

Liang Wang, MD, PhD.

TBRC-C4970

8701 Watertown Plank Road

Medical College of Wisconsin

Milwaukee, WI 53226

Phone: (414) 955-2574

Email: liwang@mcw.edu

**Supplementary Table S1. Primer and product information for junction sequence verification.**

|    | Forward primer             | Reverse primer             | Product size (bp) | Estimated Depth |
|----|----------------------------|----------------------------|-------------------|-----------------|
| J1 | CGCTATTATTGCCATTATGTATTTG  | TTTGAGGGTATTTTGTACGTTAGAAG | 91                | 3               |
| J2 | AGTGTGGCTGGAAAGTGACT       | CATGCTTGACTACTGGCTGC       | 93                | 102             |
| J3 | TCTCGCCGCACTGTTATTTTC      | AGTATGCCTGATTCATTTCCAGA    | 100               | 57              |
| J4 | TACCAGAGTTCCAACCCACC       | GTCCATGTTATTTCCCTGGCA      | 112               | 549             |
| J5 | TCTGCTACTAAGTGTGACTCAGTGAT | CAGTAAATTTTGTGAGGTTCTGC    | 99                | 10              |
| J6 | AGGAAGGTGACAGAGGGAGA       | CTGTTGGCCATTTCCCTGAGT      | 93                | 3               |
| J7 | ACACACCTGTAATCCCAGC        | CAAGAAGAGGCTCCAGGAGA       | 95                | 152             |
| J8 | CGGCTGAGGTTACCCAAGG        | GTGTCTGCCTCACCTCCTTA       | 101               | 109             |
| J9 | CTGGGTGCTGCATGGGTC         | CCAAATTCCTGCTCCCACC        | 100               | 1384            |

**Supplementary Table S2. eccDNAs with both breakpoints located inside of same type of repetitive elements in sample 1.**

| Chromosome | Left breakpoint | Right breakpoint | Repeat name     | Repeat family | Repeat class |
|------------|-----------------|------------------|-----------------|---------------|--------------|
| chr1       | 36454214        | 36455477         | L2              | L2            | LINE         |
| chr1       | 147395307       | 147397169        | L1MD1           | L1            | LINE         |
| chr2       | 123444866       | 123444894        | LTR49           | ERV1          | LTR          |
| chr2       | 132967634       | 132971585        | L2              | L2            | LINE         |
| chr3       | 104927021       | 104927406        | LTR16A          | ERV1          | LTR          |
| chr5       | 46562588        | 46562949         | ALR/Alpha       | centr         | Satellite    |
| chr5       | 77454199        | 77454375         | MLT1F1          | ERV1-MaLR     | LTR          |
| chr8       | 1604530         | 1604572          | MER5A           | hAT-Charlie   | DNA          |
| chr8       | 83414053        | 83414993         | L1MC3           | L1            | LINE         |
| chr12      | 127584013       | 127584705        | L1M4            | L1            | LINE         |
| chrX       | 18798703        | 18798968         | AluSg           | Alu           | SINE         |
| chrX       | 44860885        | 44861759         | L1M6            | L1            | LINE         |
| chrX       | 40527380        | 40528616         | ERV3-16A3_I-int | ERV1          | LTR          |
| chrY       | 19761877        | 19762899         | L1PA15          | L1            | LINE         |

**Supplementary Table S3. Statistical summary of eccDNA sequencing data in Sample 4.**

| Sample name | Replicate name | Raw read count | Mapped sequence count | Mapped genomic (MT-removed) | Mapped MT DNA | Split read counts | Number of eccDNA | MT/genome (%) |
|-------------|----------------|----------------|-----------------------|-----------------------------|---------------|-------------------|------------------|---------------|
| Sample 4    | Replicate 1    | 95,636,188     | 88,237,946            | 65,024,837                  | 23,213,109    | 3,660,541         | 19,508           | 26.3          |
|             | Replicate 2    | 108,052,748    | 99,526,315            | 79,247,082                  | 20,279,233    | 4,489,572         | 25,723           | 20.4          |
|             | Replicate 3    | 119,650,726    | 109,511,675           | 93,472,193                  | 16,039,482    | 5,022,349         | 24,764           | 14.6          |
|             | Replicate 4    | 119,040,182    | 108,552,757           | 94,500,655                  | 14,052,102    | 4,748,009         | 26,069           | 12.9          |

**Supplementary Table S4. Chromosome origins, breakpoints and read depth of eccDNAs for samples 1, 2, 3 and 4. (See Excel table of Supplementary Table S4).**

**Supplementary Table S5. Overlapped eccDNAs in replicative assays in Sample 4.**

| Chromosome | Left breakpoint | Right breakpoint | Captured in replicates |
|------------|-----------------|------------------|------------------------|
| chr1       | 23635248        | 23635449         | R1 and R2              |
| chr1       | 244236203       | 244236532        | R1 and R2              |
| chr5       | 1905508         | 1905693          | R1 and R2              |
| chr5       | 141292947       | 141293282        | R1 and R2              |
| chr6       | 122347864       | 122348057        | R1 and R2              |
| chr6       | 134828724       | 134828926        | R1 and R2              |
| chr6       | 160137773       | 160137962        | R1 and R2              |
| chr7       | 100671052       | 100671427        | R1 and R2              |
| chr7       | 149862001       | 149862319        | R1 and R2              |
| chrX       | 88300868        | 88301046         | R1 and R2              |
| chr21      | 8242643         | 8470543          | R1 and R2              |
| chr21      | 42313749        | 42313951         | R1 and R2              |
| chr2       | 27017449        | 27017764         | R3 and R4              |
| chr2       | 118385401       | 118385743        | R3 and R4              |
| chr2       | 134405916       | 134406242        | R3 and R4              |
| chr2       | 157989386       | 157989579        | R3 and R4              |
| chr3       | 42033150        | 42033480         | R3 and R4              |
| chr8       | 37626083        | 37626426         | R3 and R4              |
| chr8       | 53460110        | 53460300         | R3 and R4              |
| chr9       | 130315694       | 130315897        | R3 and R4              |
| chr11      | 64567184        | 64567390         | R3 and R4              |

---

|       |           |           |                   |
|-------|-----------|-----------|-------------------|
| chr11 | 64567189  | 64567393  | R3 and R4         |
| chr13 | 99516115  | 99516459  | R3 and R4         |
| chr17 | 43903742  | 43903925  | R3 and R4         |
| chr20 | 46839374  | 46839707  | R3 and R4         |
| chr1  | 154750235 | 154750422 | R1, R2, R3 and R4 |
| chr6  | 39078387  | 39078576  | R1, R2, R3 and R4 |

---

**Supplementary Figure S1.**

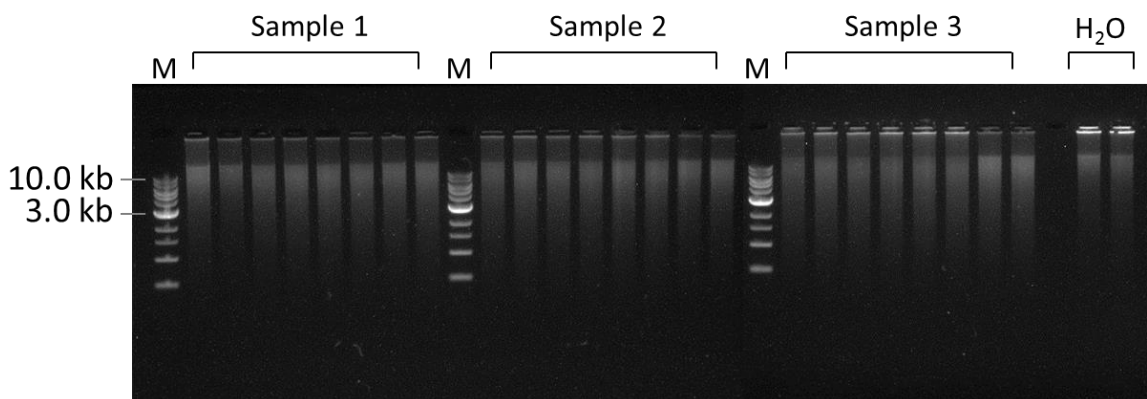

**Supplementary Figure S1. Agarose gel electrophoresis of MDA products.** The MDA products were first purified using AMPure XP beads and then analyzed using the 0.8% agarose gel electrophoresis. The results showed that each assay including H<sub>2</sub>O had the products sized above 10 kb. The non-specific amplification from H<sub>2</sub>O was confirmed by sequencing the amplified products. M: 1 kb DNA ladder (NEB).

**Supplementary Figure S2.**

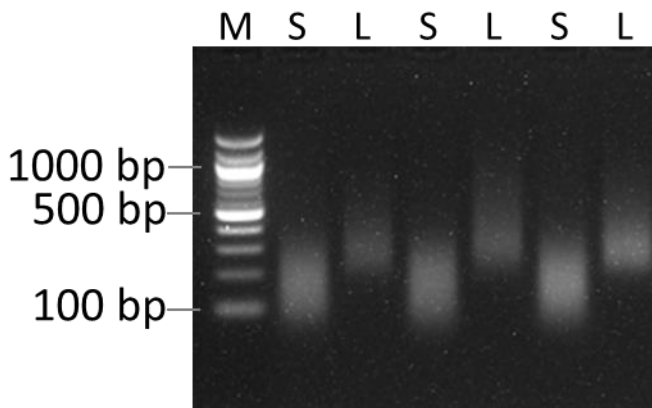

**Supplementary Figure S2. Agarose gel electrophoresis of the sonicated MDA products and DNA libraries.** The MDA products were sheared into 100-300 bp in size (lane S). The DNA libraries from sheared DNA fragments were 250-500 bp (lane L). S: sonicated DNA fragments. L: DNA libraries. M: 100 bp DNA ladder (NEB).

### Supplementary Figure S3.

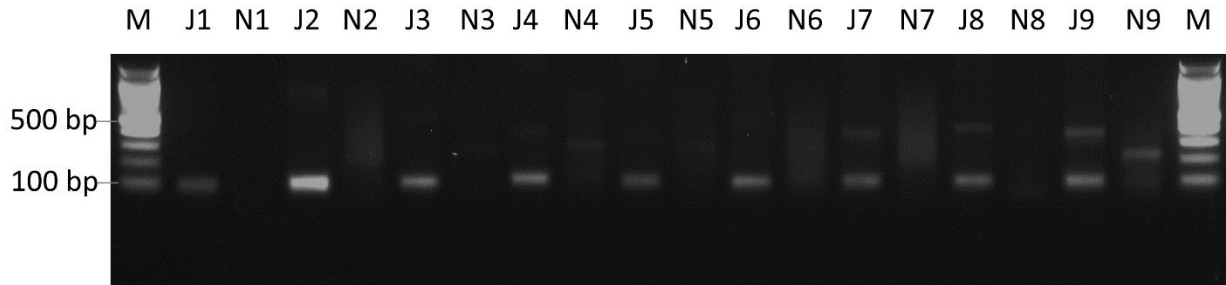

**Supplementary Figure S3. Verification of eccDNA junctions using PCR and gel electrophoresis.** Junction-specific PCRs were performed using MDA-derived products and normal human DNA as template DNA. The PCR products from eccDNAs (J1 to J9 lanes) and from normal human DNA (N1 to N9 lanes) were analyzed in 1.8% agarose gel. Positive bands with expected sizes were seen in the J1 to J9 lanes but not in the N1 to N9 lanes.

### Supplementary Figure S4.

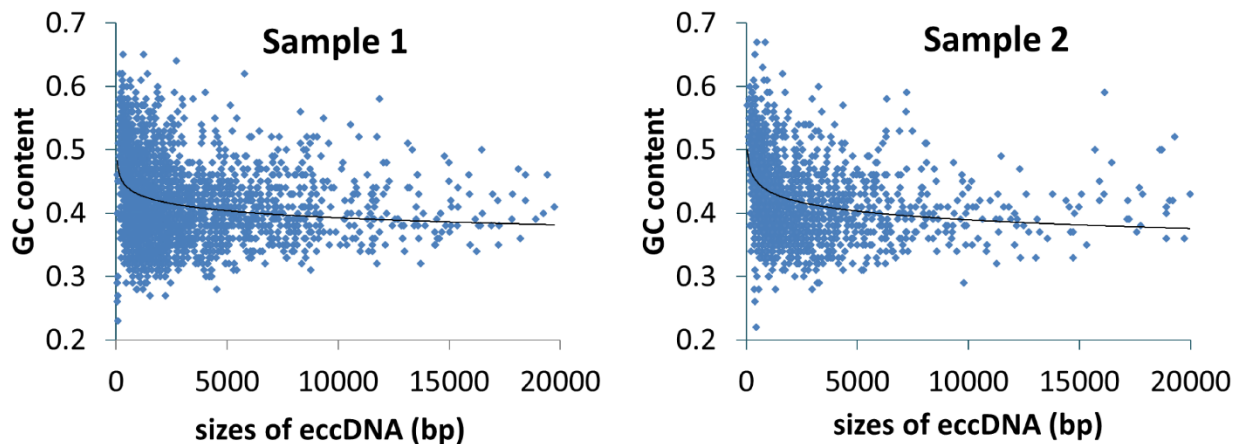

**Supplementary Figure S4. GC content and eccDNA sizes.** The smaller eccDNAs (<500 bp) show a higher GC content than the larger ones (>500 bp) in both samples 1 and 2 ( $p < 0.01$ , t-test).

Supplementary Figure S5.

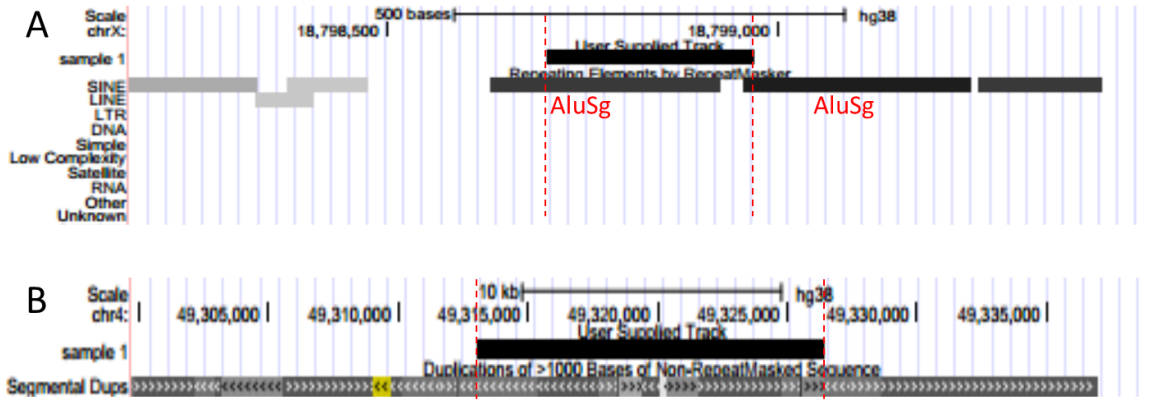

**Supplementary Figure S5. Representative eccDNAs with both ends mapped to the same type of repetitive elements or segmental duplications.** Breakpoints were intersected with repetitive elements or the segmental duplications using RepeatMasker in UCSC genome browser. Breakpoints located inside of the same type of repetitive elements are shown in A and located inside of segmental duplications shown in B. Red dashed lines across the two ends indicate the breakpoint regions. The names of repetitive elements are labeled just below the element bars.

**Supplementary Figure S6.**

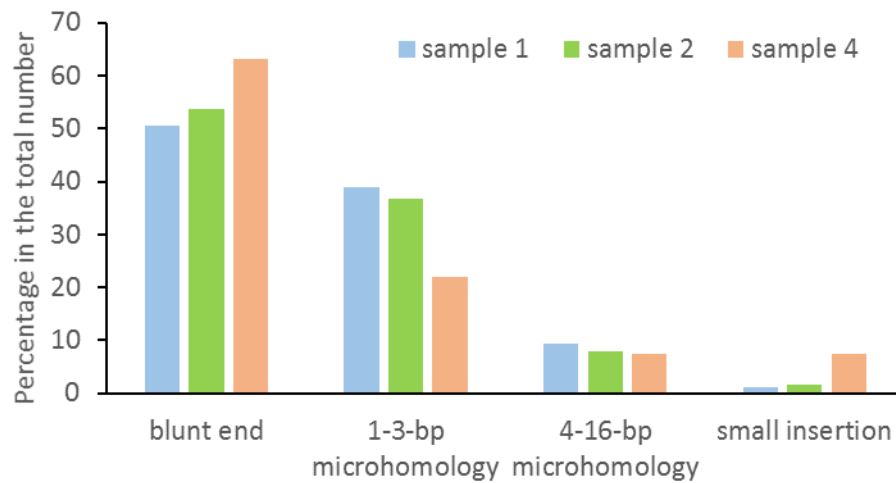

**Supplementary Figure S6. Characteristics of junction sequences in samples 1, 2 and 4.** The junction sequences were aligned to the human genome and compared for sequence characteristics. The junction types are similar in samples 1,2 and 4. Blunt end joining accounts for 50.6-63.1% of the junction sequences, 1-3 bp microhomology for 21.9-39%, 4-16 bp microhomology for 7.5-9.4%, and 1-7 bp insertions for 1-7.5%.



**Supplementary Figure S7.**

|            |                                                   |                           |
|------------|---------------------------------------------------|---------------------------|
|            | <u>Chr8 (-) 139981547</u>                         | <u>Chr8 (-) 139981500</u> |
| Reference  | AACCGTGTGGCGCCAGTCTTCTTGCAGGTTGTTATTGAGGCTTATTT   |                           |
| Junction A | AACCGTGTGGCGCCAGTCTTCTTTGTCTCTCCTTAGTGAAACCGCAT   |                           |
| Reference  | CCATGCACAACCGGAAACAGTGGATGTCTCTCCTTAGTGAAACCGCAT  | <u>Chr8 (-) 139982229</u> |
|            | <u>Chr8 (-) 139982229</u>                         | <u>Chr8 (-) 139982182</u> |
|            |                                                   |                           |
|            | <u>Chr10 (+) 93618217</u>                         | <u>Chr10 (+) 93618264</u> |
| Reference  | TTCAGGAAAGCCTAGAAAAGTACTAAGTTTCTCTTCCTAGTACTTACT  |                           |
| Junction B | TTCAGGAAAGCCTAGAAAAGTACCATATCCCTGACCACACACAACCTTT |                           |
| Reference  | CTTGGAGGCCTCCCTCTTTCATATCCCTGACCACACACAACCTTT     | <u>Chr10 (+) 93616212</u> |
|            | <u>Chr10 (+) 93616212</u>                         | <u>Chr10 (+) 93616259</u> |
|            |                                                   |                           |
|            | <u>Chr4 (-) 4334722</u>                           | <u>Chr4 (-) 4334674</u>   |
| Reference  | TTCTGAGGAATCTCCGAACCATTTTCTGCAGTGGCTGCAGCACTTCCA  |                           |
| Junction C | TTCTGAGGAATCTCCGAACCATTATAGAGGGCTCCCTGGTCTCGCGGTA |                           |
| Reference  | TCTGTCACGCCAGACAGGGCCACTAGAGGGCTCCCTGGTCTCGCGGTA  | <u>Chr4 (-) 4335458</u>   |
|            | <u>Chr4 (-) 4335458</u>                           | <u>Chr4 (-) 4335410</u>   |

**Supplementary Figure S7. Representative junction sequences in favor of NHEJ mechanism.** Junctions A, B and C show the types of blunt end joining, 1-3 bp microhomology and small insertion, respectively. Reference stands for the normal human reference sequence. Positions of the start and end of the reference sequence are shown on the above (green) and below (red) of sequences. Bases highlighted in yellow are the micro-homology sequences. Base in pink is the small insertion.

**Supplementary Figure S8.**

|            |                           |                    |                           |
|------------|---------------------------|--------------------|---------------------------|
|            | <u>Chr7 (-) 20106739</u>  |                    | <u>Chr7 (-) 20106685</u>  |
| Reference  | TCTTATTCCTCTTAGACA        | AATTAAGTCAAAC      | TATTCTATAAAAAAACTAGCTATA  |
|            |                           |                    |                           |
| Junction 1 | TCTTATTCCTCTTAGACA        | AATTAAGTCAAAC      | ATCTGTACAGCCAAAAGGCTTAAAC |
|            |                           |                    |                           |
| Reference  | CTTTTTTTTTTATTACA         | AATTAAG · AAC      | ATCTGTACAGCCAAAAGGCTTAAAC |
|            | <u>Chr7 (-) 20108494</u>  |                    | <u>Chr7 (-) 20108442</u>  |
|            |                           |                    |                           |
|            | <u>Chr6 (+) 73026164</u>  |                    | <u>Chr6 (+) 73026218</u>  |
| Reference  | TGGTCAGAGCACAAATCC        | AAACTTCTGCCCAAG    | GCCTTTGTCCCTGGAATGTACTC   |
|            |                           |                    |                           |
| Junction 2 | TGGTCAGAGCACAAATCC        | AAA · TTCT · CCAAG | AAATGGAGCACCTTGAAGGTT     |
|            |                           |                    |                           |
| Reference  | TCAAAGGACAAAGGGATG        | GAA · TTCT · CCAAG | AAATGGAGCACCTTGAAGGTT     |
|            | <u>Chr6 (+) 73023934</u>  |                    | <u>Chr6 (+) 73023985</u>  |
|            |                           |                    |                           |
|            | <u>Chr19 (-) 35735778</u> |                    | <u>Chr19 (-) 35735726</u> |
| Reference  | GAGACAGCGAAGGCAAAGA       | AGAATGGG · TTT     | GGCGTGCAGGTGGAGGGCTCAG    |
|            |                           |                    |                           |
| Junction 3 | GAGACAGCGAAGGCAAAGA       | AGAATGGG · TTT     | CTTCCCCTAAGGAGCCTGCGGC    |
|            |                           |                    |                           |
| Reference  | AGTTACCCAGTGAGCCCTGC      | AGAATGGACATTT      | CTTCCCCTAAGGAGCCTGCGGC    |
|            | <u>Chr19 (-) 35736543</u> |                    | <u>Chr19 (-) 35736489</u> |

**Supplementary Figure S8. Representative junction sequences with 4-16 bp microhomologies between breakpoint ends.** Bases highlighted in yellow are the microhomology sequences.

## Supplementary Figure S9.

Replicate 1

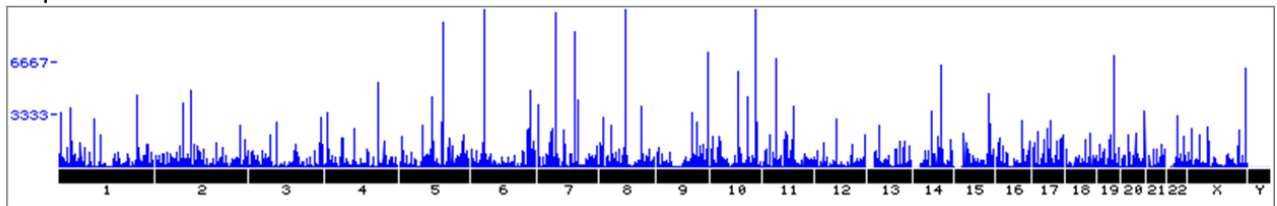

Replicate 2

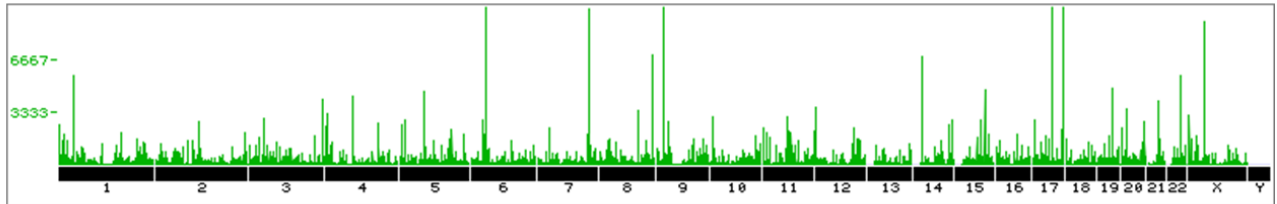

Replicate 3

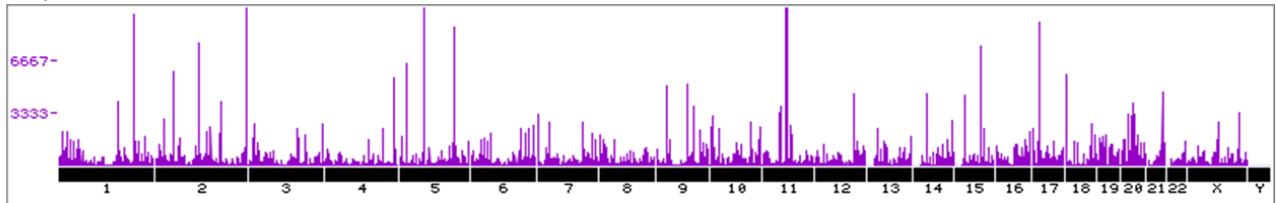

Replicate 4

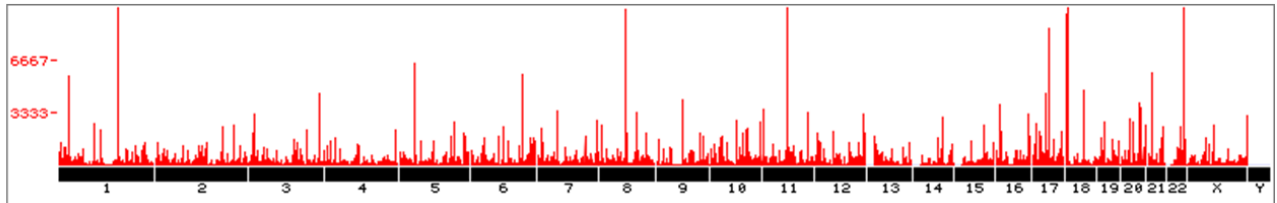

**Supplementary Figure S9. Genome view of eccDNA distribution in four replicates of sample 4.** The X axis stands for the 23 pairs of chromosomes. The Y axis shows the normalized read depth (normalized to total read count of all split reads with read depth >10).
